1 Short title: plant reproductive tissues and prey consumption

2 Conspecifics, not plant reproductive tissues, reduce omnivore prey consumption

3 S. Rinehart<sup>1,2,3,4\*</sup> and J.D. Long<sup>1,2</sup>

4 <sup>1</sup> Department of Biology, San Diego State University, San Diego, California, United States of  
5 America

6 <sup>2</sup> Coastal and Marine Institute Laboratory, San Diego State University, San Diego, California,  
7 United States of America

8 <sup>3</sup> Department of Evolution and Ecology, University of California Davis, Davis, California,  
9 United States of America

10 <sup>4</sup> Department of Ecology, Evolution, and Behavior, The Hebrew University of Jerusalem,  
11 Jerusalem, Israel

12 \*Corresponding author

13 Email: [srinehart@ucdavis.edu](mailto:srinehart@ucdavis.edu) (SR)

14

15

16

17

18

19

## 20 **Abstract**

21 Plant reproductive tissues (PRTs) can decrease (via reduced consumption) or increase (via  
22 numerical response) an omnivores consumption of animal prey. Although PRTs can increase  
23 predation pressure through numerical responses of omnivores, PRTs may also suppress predation  
24 by increasing omnivore interactions with conspecifics. Despite this potential, studies of the  
25 impacts of PRTs on predation by omnivores often overlook the effect of these tissues on  
26 intraspecific interactions between omnivores. We designed three studies to examine how PRTs  
27 and conspecific density impact prey consumption by ladybeetle omnivores. First, we assessed  
28 how PRTs impact scale insect consumption by isolated ladybeetles. Second, we measured how  
29 PRTs influence ladybeetle prey suppression when numerical responses were possible. Third,  
30 because initial experiments suggested the consumption rates of individual ladybeetles depended  
31 upon conspecific density, we compared per capita consumption rates of ladybeetles across  
32 ladybeetle density. PRTs did not influence prey consumption by isolated ladybeetles. When  
33 numerical responses were possible, PRTs did not influence total predation on prey despite  
34 increasing ladybeetle density, suggesting that PRTs decreased per capita prey consumption by  
35 ladybeetles. The discrepancy between our lab and field studies is likely a consequence of  
36 differences in ladybeetle density - the presence of only two other conspecifics decreased per  
37 capita prey consumption by 76%. Our findings suggest that PRTs may not alter the population  
38 level effects of omnivores on prey when omnivore numerical responses are offset by reductions  
39 in per capita predation rate.

40 **Keywords:** *alternative resources, consumptive effects, indirect effects, intraspecific interactions,*  
41 *non-prey foods, omnivory, pollen, apparent competition*

## 42 **Introduction**

43 Omnivory (i.e. consuming resources from multiple trophic levels) [1] is ubiquitous within  
44 several taxa (e.g. birds, mammals, reptiles, insects, and fishes) and influences the structure and  
45 function of communities [2-3]. Interactions between omnivores and their plant and animal prey  
46 can account for up to 78% of species' links in food webs [4]. Despite their prevalence, we lack a  
47 basic understanding about how plant reproductive tissues (hereafter, PRTs) affect interactions  
48 between omnivores and their prey in natural systems. Some studies suggest that PRTs decrease  
49 prey consumption by omnivores [5-6], whereas others suggest the opposite [7]. This discrepancy  
50 may be exacerbated by methodological approaches and the spatial scale of the study [8-9]. For  
51 instance, many omnivory studies focus on isolated omnivores feeding on a sub-set of possible  
52 resources, which only allows omnivore consumption to depend on resource density and the  
53 availability of PRTs [8,10]. Such approaches fail to allow important intraspecific interactions  
54 (e.g., mating, cannibalism, and competition) and interspecific interactions (e.g., predation and  
55 competition), whose occurrence may be altered by PRTs [9, 11-13]. Understanding how PRTs  
56 and conspecific density affect prey consumption by omnivores may help predict when and where  
57 omnivores exert top-down control on prey populations.

58 PRTs may suppress omnivore consumption of prey if these resources are equally (or  
59 more) palatable than prey or provide critical habitat structure [14-16]. For example, when PRTs  
60 (pollen) was available, omnivorous phytoseiid mites (*Iphiseius degenerans*) consume fewer prey  
61 (larval *Euseius stipulatus*), leading to lower prey mortality [13]. Similarly, omnivorous big-eyed  
62 bugs (*Geocoris punctipes*) consume fewer pea aphids (*Acyrtosiphon pisum*) and are less

63 effective at regulating pea aphid populations when high quality plant tissue (lima bean pods) is  
64 locally available [5].

65 In contrast, omnivore prey consumption may increase in the presence of PRTs if these  
66 resources increase the local abundance of omnivores through a numerical response (i.e.  
67 aggregation and enhanced fitness) [5, 15-18] or by lengthening omnivore persistence in habitats  
68 with low prey densities [1, 17, 19-21]. For instance, habitat patches containing high densities of  
69 PRTs (lima bean pods) had larger populations of omnivores and omnivores were less-likely to  
70 emigrate from patches containing lima bean pods [17].

71 Elevated conspecific density, due to omnivore numerical responses to PRTs, may  
72 increase the frequency of intraspecific interactions (i.e. interactions between conspecifics such as  
73 mating, cannibalism, territoriality, competition) [22-23], thereby decreasing the per capita prey  
74 consumption by omnivores [24-26]. For example, flatworm predators (*Stenostomum virginanum*)  
75 reduce their per capita predation rates on protozoan prey in the presence of conspecifics [26].  
76 Similarly, larval tiger salamanders lower their foraging rates when larger conspecifics are  
77 present, likely to minimize their risk of being cannibalized [27]. While the effects of PRTs on  
78 intraspecific (e.g., cannibalism) and intraguild interactions have been well-studied [see 9, 11-13],  
79 few studies have aimed to understand how changing omnivore densities (associated with  
80 numerical responses to PRTs) can indirectly affect prey population dynamics in the field.

81 Most empirical studies testing the impacts of PRTs on omnivore prey consumption have  
82 used insect omnivores as model systems [see 5, 7, 17, 28-32]. Many insects, like omnivores  
83 belonging to other taxa like foxes, sharks, and coyotes, are active predators [33-37], meaning that  
84 they continuously search for prey [38]. This suggests that studies of omnivorous insects may  
85 inform how non-insect omnivores impact prey populations.

86 Here, we assessed how PRTs and conspecific density affect the foraging behavior of an  
87 omnivorous salt marsh ladybeetle (*Naemia seriata*) feeding on scale insects (*Haliaspis*  
88 *spartinae*). We used laboratory mesocosms to assess the impacts of PRTs [i.e. cordgrass  
89 (*Spartina foliosa*) flowers] on ladybeetle per capita consumption of scale insects. We paired  
90 laboratory mesocosms with a field study to assess the impact of cordgrass flowers on ladybeetle  
91 and scale insect density under natural conditions, where numerical responses were possible.  
92 Finally, to reconcile our laboratory and field studies, we conducted a laboratory no-choice  
93 feeding assay to assess how conspecific density impacts ladybeetle per capita scale insect  
94 consumption.

## 95 **Methods**

### 96 **Study system**

97 We assessed how PRTs and conspecific density influence the ability of the omnivorous  
98 ladybeetle, *Naemia seriata* (hereafter ladybeetle), to suppress populations of its insect prey, the  
99 armored scale insect *Haliaspis spartinae* (hereafter, scale insects). Scale insects are specialist  
100 phloem-feeders on the foundational salt marsh plant, *Spartina foliosa* (hereafter, cordgrass). We  
101 used this ladybeetle-scale insect model system for three reasons. First, ladybeetles in this system  
102 are facultative omnivores, as access to cordgrass pollen facilitates ladybeetle survival in the  
103 absence of other dietary resources [18]. Specifically, adult ladybeetles provided only access to  
104 cordgrass pollen survived 1.97-times longer than ladybeetles provided access to no food  
105 resources. This suggests that in the absence of other prey resources, adult ladybeetles likely  
106 consume cordgrass pollen to promote their longevity. Second, adult ladybeetles show resource-  
107 dependent aggregation in the field, with ladybeetles tending to preferentially aggregate to

108 habitats containing both scale insects and cordgrass flowers over habitats lacking these resources  
109 [18]. Third, adult ladybeetles often aggregate with conspecifics on cordgrass flowers (S. Rinehart  
110 and J.D. Long *unpublished data*), suggesting that cordgrass flowers may be a hub of ladybeetle  
111 intraspecific interactions (e.g. mating and territoriality).

## 112 **Effect of cordgrass flowers on scale insect consumption by isolated** 113 **ladybeetles**

114 To test how Flower Access [2 Levels: Flower Access Present (FA+), Flower Access  
115 Absent (FA-)] affects consumption of scale insects by individual adult ladybeetles, we conducted  
116 a mesocosm experiment at the San Diego State University Coastal and Marine Institute  
117 Laboratory (CMIL). On 20-July-2015, we collected 20 sediment plugs (15 x 15 cm; diameter x  
118 deep) each containing a single flowering cordgrass stem infested with scale insects from  
119 Sweetwater Marsh (South San Diego Bay; 32° 38' 15.8''N, 117° 06' 37.5''W). We observed  
120 pollen on all cordgrass stems collected at this time. We planted cordgrass stems and field-  
121 collected sediment in 2.6 L plant pots with holes for drainage (Elite Nursery Containers; 300  
122 Series). We used toothbrushes to remove all non-scale insect resources (e.g., leafhoppers of  
123 pollen) from cordgrass leaves and to standardized initial mean total scale insect density to  $559 \pm$   
124  $73$  insects stem<sup>-1</sup> (mean  $\pm$  SE). We collected ladybeetles from two sites, Sweetwater Marsh and  
125 San Dieguito Lagoon (32° 58' 40.4''N, 117° 14' 32.8''W).

126 We placed all potted plants in an outdoor, flow-through seawater table. Plants were  
127 rearranged randomly each week. We connected our seawater table to a tidal control system that  
128 automatically changed tank tidal conditions [between high (plant pots submerged) and low (plant  
129 pots not submerged)] at preset intervals creating tidal conditions like those experienced by

130 cordgrass at Sweetwater Marsh at a tidal height of 1.5 m above sea-level. We let potted plants  
131 acclimate to tank conditions for two weeks prior to the experiment.

132 On 03-Aug-2015, we randomly assigned potted cordgrass plants to a Ladybeetle (Present,  
133 Absent) and a Flower Access treatment [Flower Access Present (FA+), Flower Access Absent  
134 (FA-)]. All treatments had scale insects present (n=5). In the Ladybeetle Present treatment, we  
135 introduced a single adult ladybeetle into each replicate. We replaced ladybeetles every other  
136 week, as we experienced a 10% mortality rate each week. In FA- treatments, we placed  
137 cordgrass flowers in 16 x 14 cm Glad Fold-Top plastic bags (The Glad Company; Oakland,  
138 California). We secured bags to plants with a cable tie. These bags prevented ladybeetle access  
139 to the flowers and thus indirectly manipulated their ability to access cordgrass pollen. In FA+  
140 treatments, we did not restrict ladybeetle access to cordgrass flowers and pollen. However, we  
141 controlled for the cable tie by attaching a cable tie to all cordgrass stems in FA+ treatments. We  
142 prevented insect dispersal among replicates by covering each entire replicate with nylon insect  
143 mesh (54 x 50 cm, height x width, mesh size = 1 mm). We maintained this experiment for 6  
144 weeks until 14-Sept-2015.

145 To assess the effect of Flower Access and Ladybeetles on scale insect density, we  
146 monitored adult and juvenile (hereafter "crawler") scale insect density every two weeks. Adult  
147 and crawler scale insects can be distinguished by their mobility and morphology (e.g. Unlike  
148 crawlers, adults are immobile and produce a white waxy test). We corrected for natural  
149 fluctuations in scale insect density by pairing replicates from the Ladybeetle Present and  
150 Ladybeetle Absent treatments and using the formula:  $P_i (A_f / A_i) - P_f$  [39]. Here,  $P_i$  and  $P_f$   
151 represent the initial and final scale insect density of Ladybeetle Present treatments and  $A_i$  and  $A_f$   
152 represent the initial and final scale insect density of Ladybeetle Absent treatments. This

153 correction allowed us to detangle natural variation in scale insect population dynamics from  
154 effects of Flower Access. We then compared our corrected adult, crawler, and total scale insect  
155 per capita consumption by ladybeetles between Flower Access (FA+, FA-) treatments using a  
156 series of two-sample t-tests. All corrected scale insect consumption data were square-root  
157 transformed. We conducted all statistical analyses in JMP v. 13 ([www.jmp.com](http://www.jmp.com)).

## 158 **Effect of cordgrass flowers on ladybeetle aggregation and scale** 159 **insect consumption**

160 To assess how Flower Access [(Flower Access Present (FA+), Flower Access Absent  
161 (FA-)] influences ladybeetle aggregation and consumption of scale insects, we conducted a fully-  
162 factorial study at San Dieguito Lagoon. On 18-Aug-2016, we established 20 - 0.25m<sup>2</sup> circular  
163 plots (separated by at least 1m) in a monospecific cordgrass stand infested with scale insects.  
164 Although ladybeetles may feed on other prey resources (e.g., leafhoppers), they likely constitute  
165 only a small portion of ladybeetle diets, as alternative prey resources are rare compared to scale  
166 insects. For example, at the experimental site, scale insect density was  $16,177 \pm 2,174$  per  
167 0.25m<sup>2</sup> (mean  $\pm$  SE), while leafhopper density was only  $25 \pm 2.8$  per 0.25m<sup>2</sup> (mean  $\pm$  SE; S.A.  
168 Rinehart *unpublished data*). All plots started with at least four flowering cordgrass stems, a  
169 cordgrass stem density of  $22 \pm 1.1$  (mean  $\pm$  SE), and zero ladybeetle egg clutches. We randomly  
170 allocated plots to each treatment (n=10). In the FA- treatment, we covered all cordgrass flowers  
171 with 16 x 14 cm Glad Fold-Top plastic bags (The Glad Company; Oakland, California) and  
172 secured bags in place with a cable tie. In the FA+ treatment, we did not inhibit ladybeetle access  
173 to cordgrass flowers. However, we controlled for the presence of cable ties in the FA+ treatment  
174 by applying cable ties to all stems included in the study. We used plastic bags to inhibit



175 ladybeetle access to cordgrass flowers rather than mesh bags, as plastic also inhibits the  
176 transmission of plant volatile cues [40].

177 To assess how Flower Access influences ladybeetle aggregation, we monitored the  
178 density of all ladybeetle life stages (adults, larvae, and egg clutches) in each plot weekly between  
179 08-Aug-2016 and 22-Sept-2016. We determined the density of ladybeetle life stages using two-  
180 minute timed searches. During timed searches, we examined all stems in each plot, starting at the  
181 soil-air interface and working toward the apical meristem. All ladybeetle life stage densities were  
182 log transformed. We tested for effects of Flower Access on the density of each ladybeetle life  
183 stage using separate RM-ANOVAs with Flower Access as a fixed factor and week as the  
184 repeated measure.

185 To understand how Flower Access influences ladybeetle suppression of scale insect  
186 populations under field conditions, we recorded scale insect density on two focal cordgrass stems  
187 (all focal stems had flowers present) in each replicate on two dates (18-Aug-2016 and 22-Sept-  
188 2016). We summed the total scale insect density on focal stems in each plot for both timepoints  
189 and used this value to calculate the change in scale insect density per plot over the five-week  
190 study. The change in scale insect density was square-root transformed. We then compared the  
191 change in scale insect density (per two focal stems) between Flower Access (FA+ vs. FA-)  
192 treatments using a two-sample t-test.

## 193 **Effect of conspecific density on ladybeetle per capita scale insect** 194 **consumption**

195 Because 1) the impact of flower access on per capita consumption of scale insects  
196 differed between our laboratory and field studies (no effect in the laboratory, decreased

197 consumption in the field) and 2) intraspecific interactions between ladybeetles also varied  
198 between these studies (absent in the laboratory, present in the field), we conducted a no-choice  
199 feeding assay to examine the influence of ladybeetle density on per capita consumption of scale  
200 insects. On 10-Nov-2017, we collected ladybeetles and flowering, scale-infested cordgrass stems  
201 (clipped at the air-soil interface) from San Dieguito Lagoon two hours prior to the study.  
202 Collected stems and ladybeetles were transported to the CMIL, where we counted the initial total  
203 scale insect density per cordgrass stem. Cordgrass stems were then randomly allocated to each  
204 Ladybeetle Density treatment: 0, 1, 2, or 3 per stem. We based the upper Ladybeetle Density  
205 treatment on survey data showing that adult ladybeetles tend to aggregate in groups of  $3 \pm 0.6$   
206 individuals per cordgrass stem. Sample size was five for all Ladybeetle Density treatments  
207 except the 0 treatment, which had three replicates. We then placed the clipped end of each  
208 cordgrass stem into its own 13 x 13 cm (height x diameter) cylindrical plastic container filled  
209 with 700 ml of tap water (to act as a vase) and enclosed the whole cordgrass stem and plastic  
210 container in a 54 x 13 cm (length x width) bag made with white nylon insect mesh (6 mm mesh  
211 opening). Finally, we introduced zero, one, two, or three adult ladybeetles to each replicate. We  
212 accidentally added four ladybeetles to one of the three ladybeetle treatments. All replicates were  
213 maintained at a mean temperature of  $21.1^{\circ}\text{C}$  with a 12:12 hour light-dark cycle ( $85.6 \pm 5 \mu\text{mol}$   
214 photons  $\cdot \text{m}^{-2} \cdot \text{s}^{-1}$  (PAR); Philips Natural Light 40W). After three days, we removed  
215 ladybeetles (no ladybeetles were lost or cannibalized during the study) and counted the final total  
216 scale insect density on all stems. We then calculated the total scale insects consumed (between  
217 all ladybeetles) and the per capita scale insect consumption of ladybeetles in all replicates.  
218 Because there was no change in scale insect density in zero ladybeetle replicates during the study  
219 (one-sample t-test:  $t_{2,00} = 0.256$ ,  $p = 0.589$ ), we removed this treatment from further analysis and

220 attributed all reductions in scale insect density to ladybeetle feeding. Using our 1,2, and 3  
221 ladybeetle treatments, we tested for the effects of ladybeetle density (consistent through the  
222 study) on total scale insect consumption and the per capita consumption of ladybeetles using  
223 linear regressions with ladybeetle density as the independent factor. Total scale insects consumed  
224 (between all ladybeetles) and the per capita scale insect consumption were square-root  
225 transformed prior to analyses.

226         On the 2<sup>nd</sup> and 3<sup>rd</sup> days of the assay (11-Nov-2017 and 12-Nov-2017), we conducted  
227 behavioral observations of ladybeetles in all replicates. On each day, we recorded the location  
228 (i.e., plant leaf, plant stem, plant flower, or mesh bag) of each ladybeetle in each replicate  
229 between the hours of 08:00 and 10:00 am. We then calculated the number of ladybeetles in each  
230 replicate that were on any part of the plant (e.g., leaves, stem, or flower) at the time of  
231 observation. We tested for effects of ladybeetle density on the number of ladybeetles on any part  
232 of the plant using a RM-ANOVA with Ladybeetle Density as a fixed factor and Observation Day  
233 as the repeated measure.

## 234 **Results**

### 235 **Effect of cordgrass flowers on scale insect consumption by isolated** 236 **ladybeetles**

237         Although ladybeetles have been observed consuming pollen (S.A. Rinehart *personal*  
238 *observation*), consumption of adult, crawler, and total scale insects by isolated ladybeetles was  
239 not affected by access to cordgrass flowers (Adults:  $t_{6,59} = 0.052$ ,  $p = 0.96$ ; Crawlers:  $t_{5,32} =$   
240  $0.596$ ,  $p = 0.576$ ; Total:  $t_{7,89} = 0.216$ ,  $p = 0.834$ ; Fig 1).

241 **Fig 1. Effect of PRTs on isolated ladybeetle foraging.** Control corrected mean ( $\pm$  SE)  
242 consumption by isolated adult ladybeetles of a) adult, b) crawler, and c) total scale insects (n =  
243 5).

## 244 **Effect of cordgrass flowers on ladybeetle aggregation and scale** 245 **insect consumption**

246 In our field experiment, adult ladybeetle density depended on Flower Access ( $F_{1,107} =$   
247 43.69,  $p < 0.001$ ; S1 Table) and week ( $F_{5,107} = 6.73$ ,  $p < 0.001$ ). Ladybeetles increased with both  
248 factors. Flower Access and week also had an interactive effect on local adult ladybeetle density  
249 ( $F_{5,107} = 6.65$ ,  $p < 0.001$ , Fig 2a). This interaction resulted from the differential effects of Flower  
250 Access on adult ladybeetle density through time. Specifically, adult ladybeetle density in plots  
251 with flower access increased by 412%, while adult ladybeetle density in plots without flower  
252 access actually decreased by 8% over the five-week study. Additionally, this effect was  
253 strengthened by differences in the initial adult ladybeetle density between treatments, as plots  
254 without flower access tended to have more adult ladybeetles than plots with flower access at the  
255 start of the study [Initial Adult Ladybeetle Density: BF:  $3.7 \pm 0.56$  (mean  $\pm$  SE); UBF:  $2.5 \pm 0.34$   
256 (mean  $\pm$  SE); Two-Sample T-Test (Factor = Flower Access):  $t_{14,9} = 1.83$ ,  $p = 0.087$ ].

257 **Fig 2. Effect of PRTs on ladybeetle population dynamics in the field.** Mean ( $\pm$  SE) density of  
258 ladybeetle a) adults, b) larvae, and c) egg clutches in 0.25m<sup>2</sup> manipulated field plots. Flower  
259 Access treatments (n= 10) are as follows: Flower Access Present (FA+) and Flower Access  
260 Absent (FA-).

261 Similar to effects on adult ladybeetles, larval ladybeetle density was impacted by Flower  
262 Access ( $F_{1,107} = 5.67$ ,  $p = 0.019$ ; S2 Table) and week ( $F_{5,107} = 5.08$ ,  $p < 0.001$ ). Regardless of

263 flower access, larval ladybeetle density peaked in all plots at week two (Fig 2b). However, the  
264 presence of cordgrass flowers increased larval ladybeetle density by 36% over the five-week  
265 study, while removing access to cordgrass flowers decreased larval ladybeetle density by 40%  
266 after five weeks.

267 The density of ladybeetle egg clutches depended upon time ( $F_{5,107} = 22.3$ ,  $p < 0.001$ ; S3  
268 Table), with clutch density peaking at week three in both treatments. Flower Access had no  
269 effect on egg clutch density ( $F_{1,107} = 0.38$ ,  $p = 0.539$ ; Fig 2c), despite adult ladybeetles being 4x  
270 more abundant in Flower Access Present plots.

271 Total scale insect density declined in both treatments over the five-week study (Fig 3).  
272 However, there was no difference between Flower Access treatments in the change in scale  
273 insect density during the study, despite the higher density of adult ladybeetles in plots with  
274 flower access ( $t_{13,07} = 0.347$ ,  $p = 0.734$ ).

275 **Fig 3. Effect of PRTs on ladybeetle foraging in the field.** Mean ( $\pm$  SE) change in scale insect  
276 density on two focal cordgrass stems in our 0.25m<sup>2</sup> manipulated field plots (n = 10).

## 277 **Effect of conspecific density on ladybeetle per capita scale insect** 278 **consumption**

279 In the presence of 1-3 conspecifics, adult ladybeetle density had no effect on the total  
280 number of scale insects consumed (linear regression:  $R^2 = 0.07$ ,  $p = 0.341$ ; Fig 4a) and no  
281 cannibalistic activities between ladybeetles occurred. This result suggests that as conspecific  
282 density increased, per capita consumption of scale insects declined (linear regression:  $R^2 = 0.489$ ,  
283  $p = 0.002$  Fig. 4b). For example, adult ladybeetle per capita scale insect consumption (over three

284 days) was  $201 \pm 58$  (mean  $\pm$  SE) for individual ladybeetles, but only  $48 \pm 20$  (mean  $\pm$  SE) for  
285 ladybeetles with two conspecifics (i.e. three adult ladybeetle treatment).

286 **Fig 4. Effect of conspecific density on ladybeetle foraging rates.** Mean ( $\pm$  SE) per capita  
287 consumption by adult ladybeetles of a) adult scale insects and b) total scale insects. Sample size  
288 five for all ladybeetle density treatments except the 3-ladybeetle treatment ( $n = 4$ ) and 4-  
289 ladybeetle treatment ( $n = 1$ ).

290 The number of ladybeetles observed on cordgrass plants (i.e., either leaves, stem, or  
291 flower) was not affected by Ladybeetle Density ( $F_{2,12} = 0.68$ ,  $p = 0.523$ ) or Observation Day  
292 ( $F_{1,12} = 4.00$ ,  $p = 0.069$ ; S4 Table, S1 Fig). For example, during the first observation day,  
293 replicates with 1 ladybeetle had  $0.6 \pm 0.24$  (mean  $\pm$  SE) ladybeetles present on the cordgrass  
294 plant, while replicates with 3+ ladybeetles had  $1.0 \pm 0.32$  (mean  $\pm$  SE) ladybeetles on the  
295 cordgrass plant. Similarly, on the second observation day replicates with 1 ladybeetle had  $0.2 \pm$   
296  $0.2$  (mean  $\pm$  SE) ladybeetles present on the cordgrass plant, while replicates with 3+ ladybeetles  
297 had  $0.4 \pm 0.4$  (mean  $\pm$  SE) ladybeetles on the cordgrass plant. Thus, regardless of ladybeetle  
298 density within the replicate, ladybeetle density on the cordgrass plant appears to remain constant-  
299 suggesting that adult ladybeetles may avoid habitats already occupied by conspecifics.

## 300 Discussion

301 Plant reproductive tissues (PRTs) can increase or decrease prey consumption by altering  
302 omnivore foraging behavior. In laboratory mesocosms, isolated adult ladybeetle prey  
303 consumption was unaffected by cordgrass flowers (Fig 1). In the field, habitat patches containing  
304 access to cordgrass flowers attracted 4x as many adult ladybeetles compared to habitats lacking  
305 flower access (Fig 2a). However, elevated ladybeetle densities in habitats with cordgrass flower

306 access did not result in greater loss of scale insect prey (Fig 3), suggesting that PRTs resources  
307 reduced ladybeetle per capita consumption of scale insects. This discrepancy (PRTs had no effect  
308 in the lab but reduced per capita prey consumption in the field), may be related to intraspecific  
309 interactions (e.g., interference competition) between ladybeetles which were absent in the lab  
310 study with isolated ladybeetles. This hypothesis is supported by our finding that increasing  
311 conspecific density reduced per capita consumption of scale insects by ladybeetles. Overall,  
312 these observations suggest that PRTs may not impact the population level effects of omnivores  
313 on prey when numerical responses of omnivores are offset by reductions in their per capita  
314 predation rates.

315 PRTs decreased per capita consumption by omnivores on animal prey in our field study  
316 that allowed for intraspecific interactions between omnivores. Although access to PRTs (i.e.  
317 cordgrass flowers) increased adult and larval omnivore populations (412% and 36%,  
318 respectively), this did not translate into a change in animal prey density. Thus, our laboratory  
319 study of isolated adult omnivores and our field study contradict each other - access to PRTs  
320 reduced per capita consumption of animal prey by omnivores in the field but not the lab.

321 Omnivore feeding rates in the presence of PRTs may have differed in our laboratory and  
322 field experiments for two reasons. First, local environmental conditions may alter omnivore  
323 consumption of prey. For example, temperature can directly impact the metabolic rate of  
324 ectothermic omnivores, altering their energetic needs and, in turn, their foraging rates. However,  
325 we tried to minimize differences in environmental conditions between the laboratory and the  
326 field by 1) standardizing the month (August) of both experiments and 2) running our laboratory  
327 mesocosm study in outdoor seawater tables with natural tidal cycles (exposing experimental  
328 units to the ambient environmental conditions in southern California).

329           Second, the density of omnivores differed between our first laboratory (single omnivore)  
330 and field (multiple omnivores) studies. Differences in omnivore density may explain our  
331 conflicting findings if intraspecific interactions (e.g. mating, territoriality, or cannibalism) reduce  
332 omnivore consumption of focal prey resources. This seems likely, since our laboratory no-choice  
333 feeding assay found that conspecifics reduce ladybeetle per capita scale insect consumption (Fig  
334 4). These findings parallel those of our field study, as ladybeetle populations in cordgrass flower  
335 habitats, despite being nearly 4x larger, removed the same number of scale insects as ladybeetles  
336 in plots lacking flower access (Figs 2 and 3). A recent meta-analysis suggests that the effects of  
337 PRTs on omnivore prey consumption depends on the ability of omnivores to elicit numerical  
338 responses. Specifically, in the presence of PRT, allowing omnivore numerical responses  
339 increased omnivore prey rate on animal prey, while not allowing numerical responses decreased  
340 omnivore predation rate on animal prey (Rinehart and Long *in prep.*).

341           While several studies have aimed to assess the impacts of PRTs on intraguild predation  
342 and cannibalism [see 9, 11-13], few have tested how elevated omnivore conspecific density (due  
343 to numerical responses to PRTs) may affect omnivore foraging behavior and local prey  
344 mortality. Here, we found that the presence of only two other conspecifics (i.e. 3+ ladybeetle  
345 treatment) decreased per capita prey consumption by 76% in just three days. Omnivores may  
346 consume fewer animal prey in the presence of conspecifics if they trade-off between foraging on  
347 prey and engaging in intraspecific interactions (e.g. mating or interference competition). For  
348 example, in our laboratory feeding assay, we frequently observed a single ladybeetle occupying a  
349 cordgrass plant at a time- regardless of ladybeetle density (i.e., 1,2, or 3+ ladybeetles). This  
350 observation suggests that adult ladybeetles may reduce their foraging efforts to avoid interacting  
351 with other ladybeetles at small spatial scales.



352 Changes in omnivore conspecific density and the availability of PRTs may also influence  
353 the rate of cannibalism between ladybeetles in our study system. For instance, post-aggregation  
354 cannibalism may explain why adult ladybeetle densities were 4x lower in field plots that denied  
355 ladybeetles access to flowers than those allowing ladybeetles access to flowers. However,  
356 cannibalism is unlikely in this system for two reasons. First, we never observed cannibalism  
357 between individual ladybeetles in the laboratory (including during our three-day no-choice  
358 assay) or the field (S.A. Rinehart *personal observation*). Second, cannibalistic events are most  
359 likely to occur when food resources, especially prey, are limited [12]. In all our studies,  
360 ladybeetles never consumed all scale insects in their environment, suggesting that the availability  
361 of prey was never limiting.

362 The effect of PRTs on prey consumption by omnivores is commonly attributed to  
363 nutritional benefits- as plants and animals vary in their nutrient, vitamin, mineral, and water  
364 content [41]. However, PRTs may also affect omnivore behavior by increasing habitat  
365 complexity. For example, habitat complexity can alter omnivore predation rates and antagonistic  
366 intraspecific interactions [42-43]. In our system, ladybeetles preferentially use cordgrass flowers  
367 as habitat - field surveys of randomly-selected cordgrass stems (n=95 individual flowering  
368 cordgrass stems) found that 88% of adult ladybeetles were found on cordgrass flowers versus  
369 other tissues (S5 Table).

370 The rate of omnivore prey consumption can be influenced by several factors. Historically,  
371 omnivory studies have focused on the impacts of PRTs on prey consumption and have found  
372 evidence that PRTs can both increase and decrease the rate of prey consumption by omnivores  
373 [5-7]. PRTs can increase local omnivore predation rates by attracting omnivores- as PRTs  
374 provide omnivores additional food resources and habitat structure [14-16]. However, few studies

375 have tried to understand how local increases in omnivore conspecific density (due to aggregation  
376 to PRTs) ultimately affect omnivore-prey interactions. Here, we show that omnivore numerical  
377 responses to PRTs alter the foraging behaviors of omnivores, due to shifts in local conspecific  
378 density. Overall, our findings suggest a need to assess the indirect effects of PRTs on omnivore  
379 foraging behaviors to better understand how omnivory influences food web structure and  
380 function.

## 381 **Acknowledgements**

382 We would like to thank B. Collins and S. Schroeter for access to Sweetwater Marsh and San  
383 Dieguito Lagoon. T. Grosholz, R. Karban, D. Deutschman, G. Vermeji, and J. Walker provided  
384 comments that improved the study design and final manuscript. F. Ventola, G. Cooper, and C.  
385 Knight provided field and laboratory assistance. Thank you to N. Fulner, K. Habersberger, Z.  
386 Kornfeld, and E.L. Yang for providing inspiration throughout this project. This is contribution  
387 No. XX of San Diego State University's Coastal and Marine Institute. Author contribution  
388 statement: S.A.R conceived the project. S.A.R. and J.D.L. designed the study. S.A.R. performed  
389 the experiments and analyzed the data. S.A.R. and J.D.L. wrote the manuscript.

## 390 **Literature Cited**

- 391 1. Pimm SL, Lawton JH (1978) On feeding on more than one trophic level. *Nature* 275: 542-  
392 544.
- 393 2. Polis GA, Myers CA, Holt RD (1989) The ecology and evolution of intraguild predation:  
394 Potential competitors that eat each other. *Annual Review of Ecology and Systematics* 20:  
395 297-330.

- 396 3. Polis GA, Strong DR (1996) Food web complexity and community dynamics. *The American*  
397 *Naturalist* 147: 813-846.
- 398 4. Polis, GA (1991) Complex trophic interactions in deserts: An empirical critique of food-web  
399 theory. *The American Naturalist* 138: 123-155.
- 400 5. Eubanks MD, Denno RF (2000) Host plants mediate omnivore-herbivore interactions and  
401 influence prey suppression. *Ecology* 81: 936-947.
- 402 6. Badii MH, Hernandez-Ortiz E, Flores AE, Landeros J (2004) Prey stage preference and  
403 functional response of *Euseius hibisci* to *Teranychus urticae* (Avari: Phytoseiidae,  
404 Tetranychidae). *Experimental and Applied Acarology* 34: 263-273.
- 405 7. Maselou DA, Perdikis DCh, Sabelis MW, Fantinou AA (2014) Use of plant resources by an  
406 omnivorous predator and the consequences for effective predation. *Biological Control* 79:  
407 92-100.
- 408 8. Abrams PA, Ginzburg LR (2000) The nature of predation: Prey dependent, ratio dependent,  
409 or neither? *Trends in Ecology and Evolution* 15: 337-341.
- 410 9. Shakya S, Weintraub PG, Coll M (2009) Effect of pollen supplement on intraguild predatory  
411 interactions between two omnivores: The importance of spatial dynamics. *Biological Control*  
412 50: 281-287.
- 413 10. Hassell MP (1978) *The dynamics of arthropod predator-prey systems*, Princeton University  
414 Press, Princeton, New Jersey, U.S.A.
- 415 11. Groenteman R, Guershon M, Coll M (2006) Effects of leaf nitrogen content on oviposition  
416 site selection, offspring performance, and intraspecific interactions in an omnivorous bug.  
417 *Ecological Entomology* 31: 155-161.

- 418 12. Leon-Beck M, Coll M (2007) Plant and prey consumption cause a similar reduction in  
419 cannibalism by an omnivorous bug. *Journal of Insect Behavior* 20: 67-76.
- 420 13. Calabuig A, Pekas A, Wäckers FL (2018) The quality of nonprey food affects cannibalism,  
421 intraguild predation, and hyperpredation in two species of phytoseiid mites. *Journal of*  
422 *Economic Entomology* 111: 72-77.
- 423 14. Abrams PA (1987) On classifying interactions between populations. *Oecologia* 73: 272-281.
- 424 15. Cottrell TE, Yeargan KV (1998) Influence of a native weed, *Acalypha ostryaefolia*  
425 (Euphorbiaceae), on *Coleomegilla maculata* (Coleoptera: Coccinellidae) population density,  
426 predation, and cannibalism in sweet corn. *Environmental Entomology* 27: 1375-1385.
- 427 16. Musser FR, Shelton AM (2003) Predation of *Ostrinia nubilalis* (Lepidoptera: Crambidae)  
428 eggs in sweet corn by generalist predators and the impact of alternative foods. *Biological*  
429 *Control* 32: 1131-1138.
- 430 17. Eubanks MD, Denno RF (1999) The ecological consequences of variation in plants and prey  
431 for an omnivorous insect. *Ecology* 80: 1253-1266.
- 432 18. Rinehart SA, Long JD (2018) Habitat use is linked to resource-specific performance of an  
433 ecologically important marsh predator. *Ecosphere* 9: doi: e02273.10.1002/ecs2.2273.
- 434 19. Crawley MJ (1975) Numerical responses of insect predators to changes in prey density.  
435 *Journal of Animal Ecology* 44: 877-892.
- 436 20. Pimm SL, Lawton JH (1977) Number of trophic levels in ecological communities. *Nature*  
437 268: 329-331.
- 438 21. Walde SJ (1994) Immigration and the dynamics of a predator-prey interaction in biological  
439 control. *Journal of Animal Ecology* 63: 337-346.

- 440 22. Wildy EL, Chivers DP, Kiesecker JM, Blaustein AR (2001) The effects of food level and  
441 conspecific density on biting and cannibalism in larval long-toed salamanders, *Ambystoma*  
442 *macrodactylum*. *Oecologia* 128: 202-209.
- 443 23. Gage MJ (1995) Continuous variation in reproductive strategy as an adaptive response to  
444 population density in the moth *Plodia interpunctella*. *Proceedings of the Royal Society of*  
445 *London Biological Sciences* 261: 25-30.
- 446 24. Mansour R, Lipcius R (1991) Density-dependent foraging and mutual interference in blue  
447 crabs preying on infaunal clams. *Marine Ecology Progress Series* 72: 239-246.
- 448 25. Skalski GT, Gilliam JF (2001) Functional responses with predator interference: Viable  
449 alternatives to the Holling Type II model. *Ecology* 82: 3083-3092.
- 450 26. Kratina P, Vos M, Bateman A, Anholt BR (2009) Functional responses modified by predator  
451 density. *Oecologia* 159: 425-433.
- 452 27. Ziemba RE, Collins JP (1999) Development of size structure in tiger salamanders: The role  
453 of intraspecific interference. *Oecologia* 120: 524-529.
- 454 28. Janssen A, Willemsse E, Van Der Hammen T (2003) Poor host plant quality causes omnivore  
455 to consume predator eggs. *Journal of Animal Ecology* 72: 478-483.
- 456 29. Robinson KA, Jonsson M, Wratten SD, Wade MR, Buckley HL (2008) Implications of floral  
457 resources for predation by an omnivorous lacewing. *Basic and Applied Ecology* 9: 172-181.
- 458 30. Frank SD, Shrewsbury PM, Denno RF (2010) Effects of alternative food on cannibalism and  
459 herbivore suppression by carabid larvae. *Ecological Entomology* 35: 61-68.
- 460 31. Frank SD, Shrewsbury PM, Denno RF (2011) Plant versus prey resources: Influence on  
461 omnivore behavior and herbivore suppression. *Biological Control* 57: 229-235.

- 462 32. Maselou DA, Perdikis DCh, Sabelis MW, Fantinou AA (2015) Plant resources as a factor  
463 altering emergent multi-predator effects. PLoS ONE 10: 1-16.
- 464 33. Schmitz OJ (2005) Behavior of predators and prey and links with population-level processes.  
465 In: Barbosa P, Castellanos I, ed. Ecology of predator-prey interactions. New York, NY:  
466 Oxford University Press. pp 256-278.
- 467 34. Preisser EL, Orrock JL, Schmitz OJ (2007) Predator hunting mode and habitat domain alter  
468 nonconsumptive effects in predator-prey interactions. Ecology 88: 27744-2751.
- 469 35. Romero GQ, Antiqueria PAP, Koricheva J (2011) A meta-analysis of predation risk effects  
470 on pollinator behavior. PLoS ONE 6: e20689. doi:10.1371/journal.pone.0020689.
- 471 36. Towner AV, Leos-Barajas V, Langrock R, Schick RS, Smale MJ, et al. (2016) Sex-specific  
472 and individual preferences for hunting strategies in white sharks. Functional Ecology 30:  
473 1397-1407.
- 474 37. Rinehart SA, Schroeter SC, Long JD (2017) Density-mediated indirect effects from active  
475 predators and narrow habitat domain prey. Ecology 98: 2653-2661.
- 476 38. Schmitz OJ, Krivan V, Ovadia O (2004) Trophic cascades: The primacy of trait-mediated  
477 indirect interactions. Ecology Letters 7: 153-163.
- 478 39. Peterson CH, Renaud PE (1989) Analysis of feeding preference experiments. Oecologia 80:  
479 82-86.
- 480 40. Karban R, Shiojiri K, Huntzinger M, McCall AC (2006) Damage-induced resistance in  
481 sagebrush: Volatiles are key to intra- and interplant communication. Ecology 87: 922-930.
- 482 41. Coll M, Guershon M (2002) Omnivory in terrestrial arthropods: Mixing plant and prey diets.  
483 Annual Review of Entomology 47: 267-297.

- 484 42. Buck TL, Breed GA, Pennings SC, Chase ME, Zimmer M, et al. (2003) Diet choice in an  
485 omnivorous salt-marsh crab: Different food types, body size, and habitat complexity. *Journal*  
486 *of Experimental and Marine Biology and Ecology* 292: 103-116.
- 487 43. Corkum LD, Cronin DJ (2004) Habitat complexity reduces aggregation and enhances  
488 consumption in crayfish. *Journal of Ethology* 22: 23-27.

## 489 **Supporting information**

490 **S1 Table. Repeated measures ANOVA for mean adult ladybeetle density between Flower**  
491 **Access treatments across the field six-week study.**

492 **S2 Table. Repeated Measures ANOVA for mean larval ladybeetle density between Flower**  
493 **Access treatments across the six-week field study.**

494 **S3 Table. Repeated Measures ANOVA for mean egg clutch density between Flower Access**  
495 **treatments across the six-week field study.**

496 **S4 Table. Repeated Measures ANOVA for number of ladybeetles on cordgrass plants**  
497 **between Ladybeetle Density treatments at two timepoints.**

498 **S1 Fig. Effect of conspecific density on adult ladybeetle behavior in laboratory no-choice**  
499 **feeding assays.** Mean ( $\pm$  SE) number of adult ladybeetles observed on cordgrass plant tissues in  
500 the laboratory no-choice feeding assay on the 2<sup>nd</sup> and 3<sup>rd</sup> days of the assay (n=5 per beetle  
501 density treatment).

502

503

504

505

506

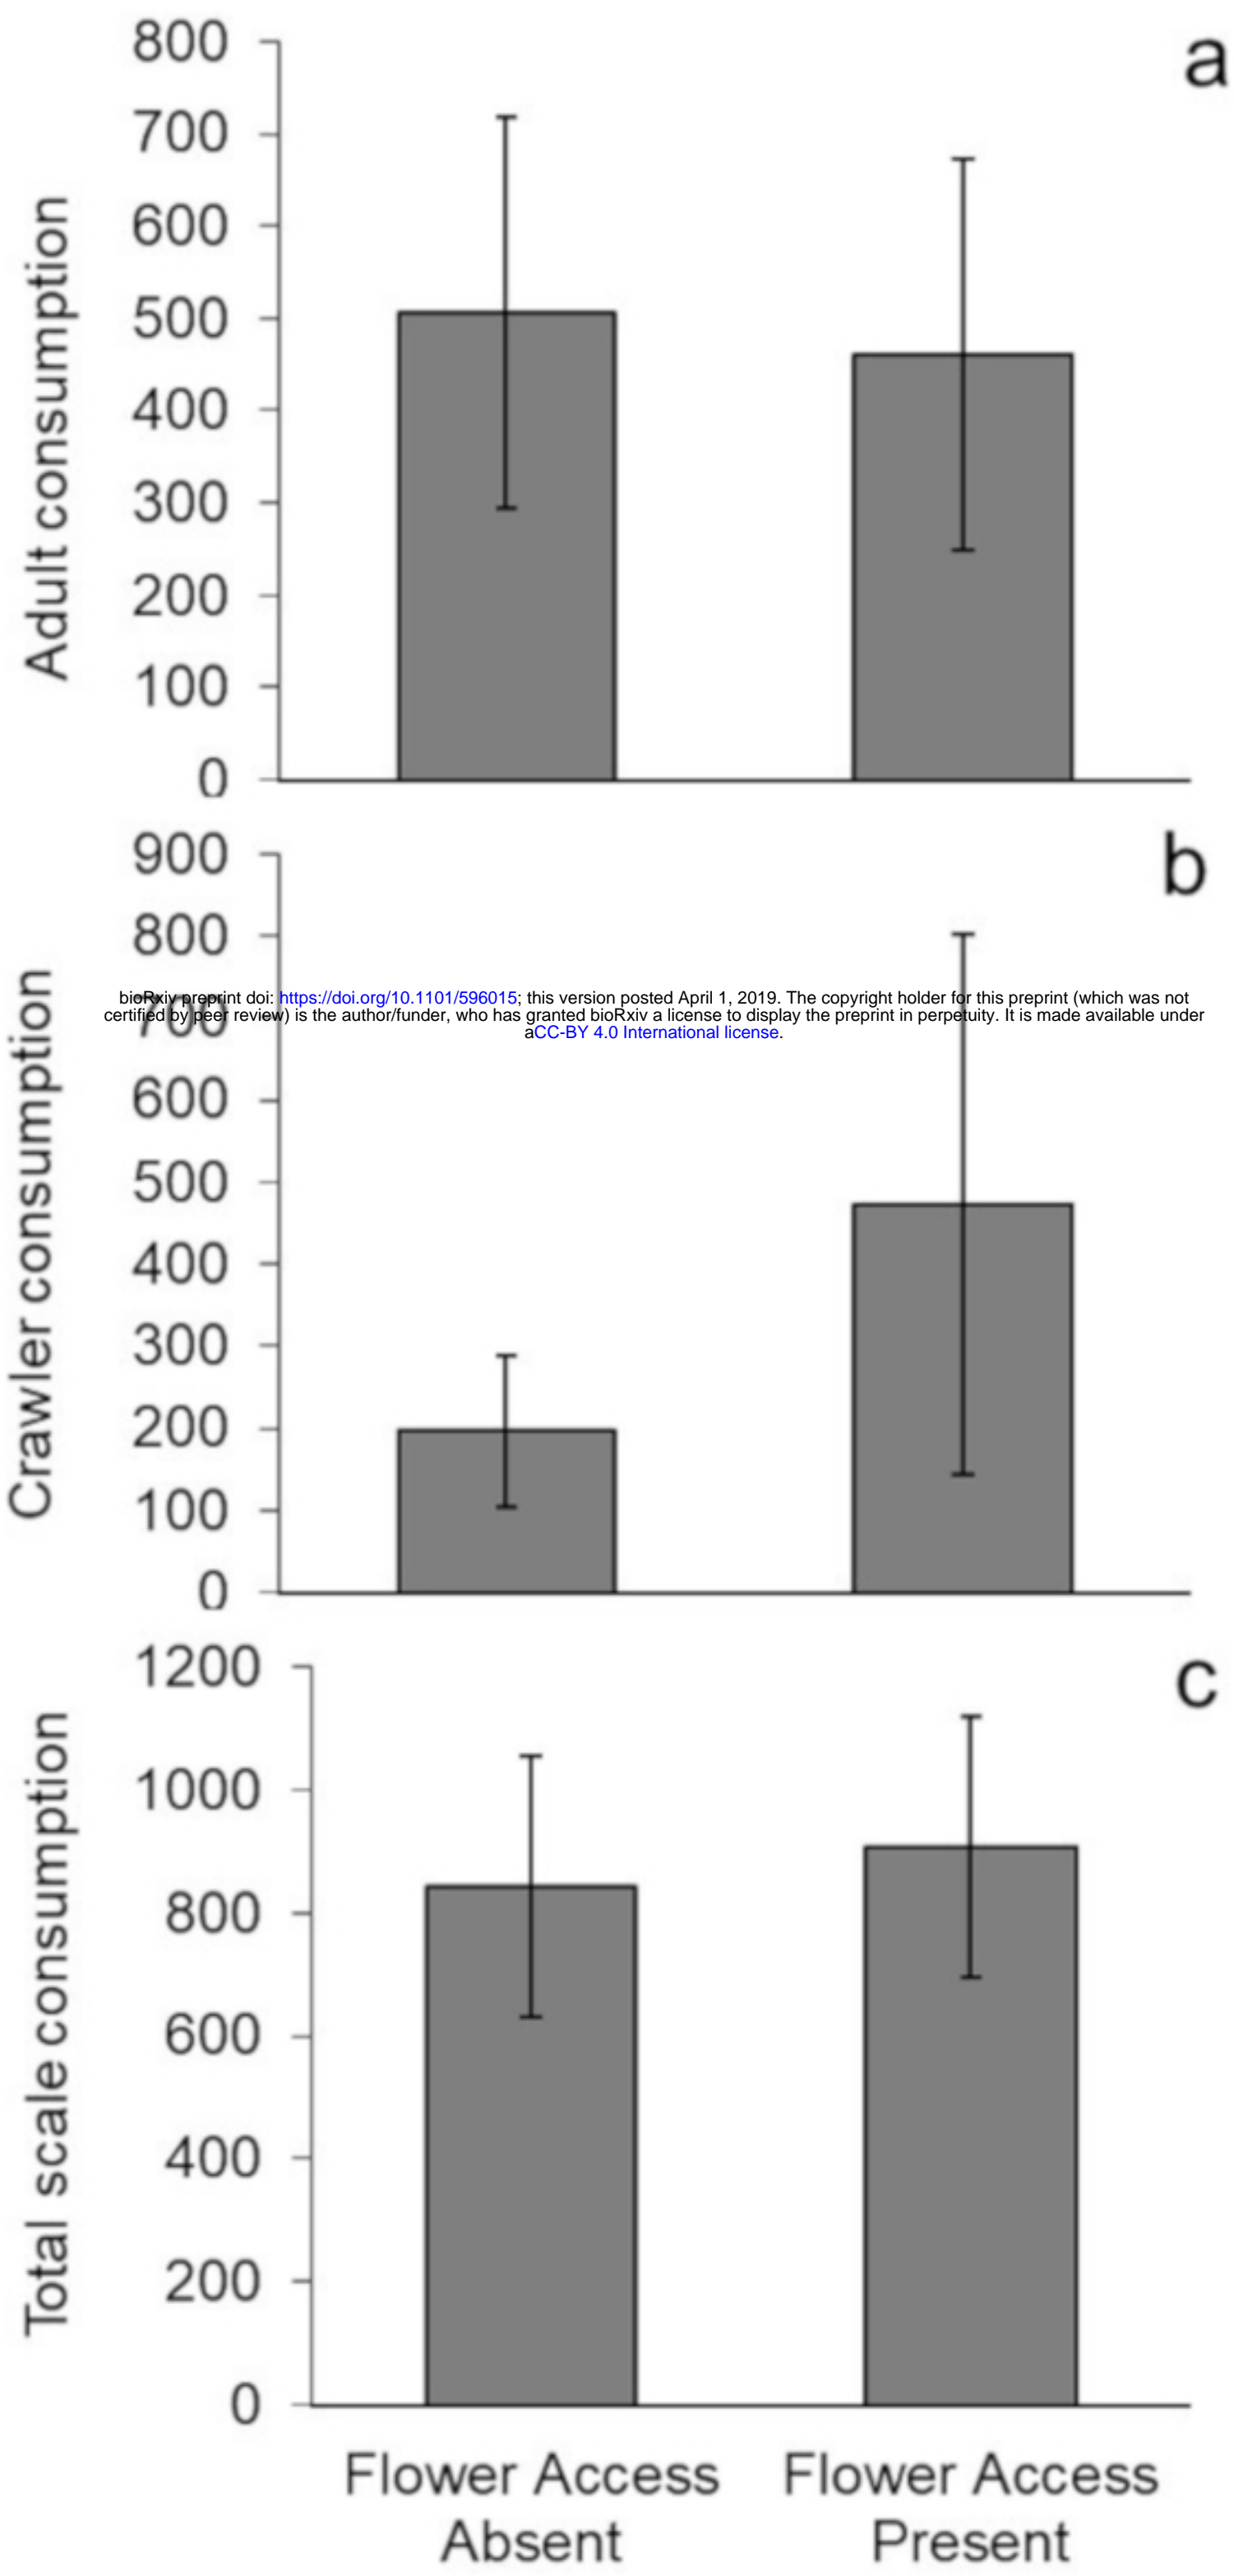

bioRxiv preprint doi: <https://doi.org/10.1101/596015>; this version posted April 1, 2019. The copyright holder for this preprint (which was not certified by peer review) is the author/funder, who has granted bioRxiv a license to display the preprint in perpetuity. It is made available under aCC-BY 4.0 International license.

Figure 1



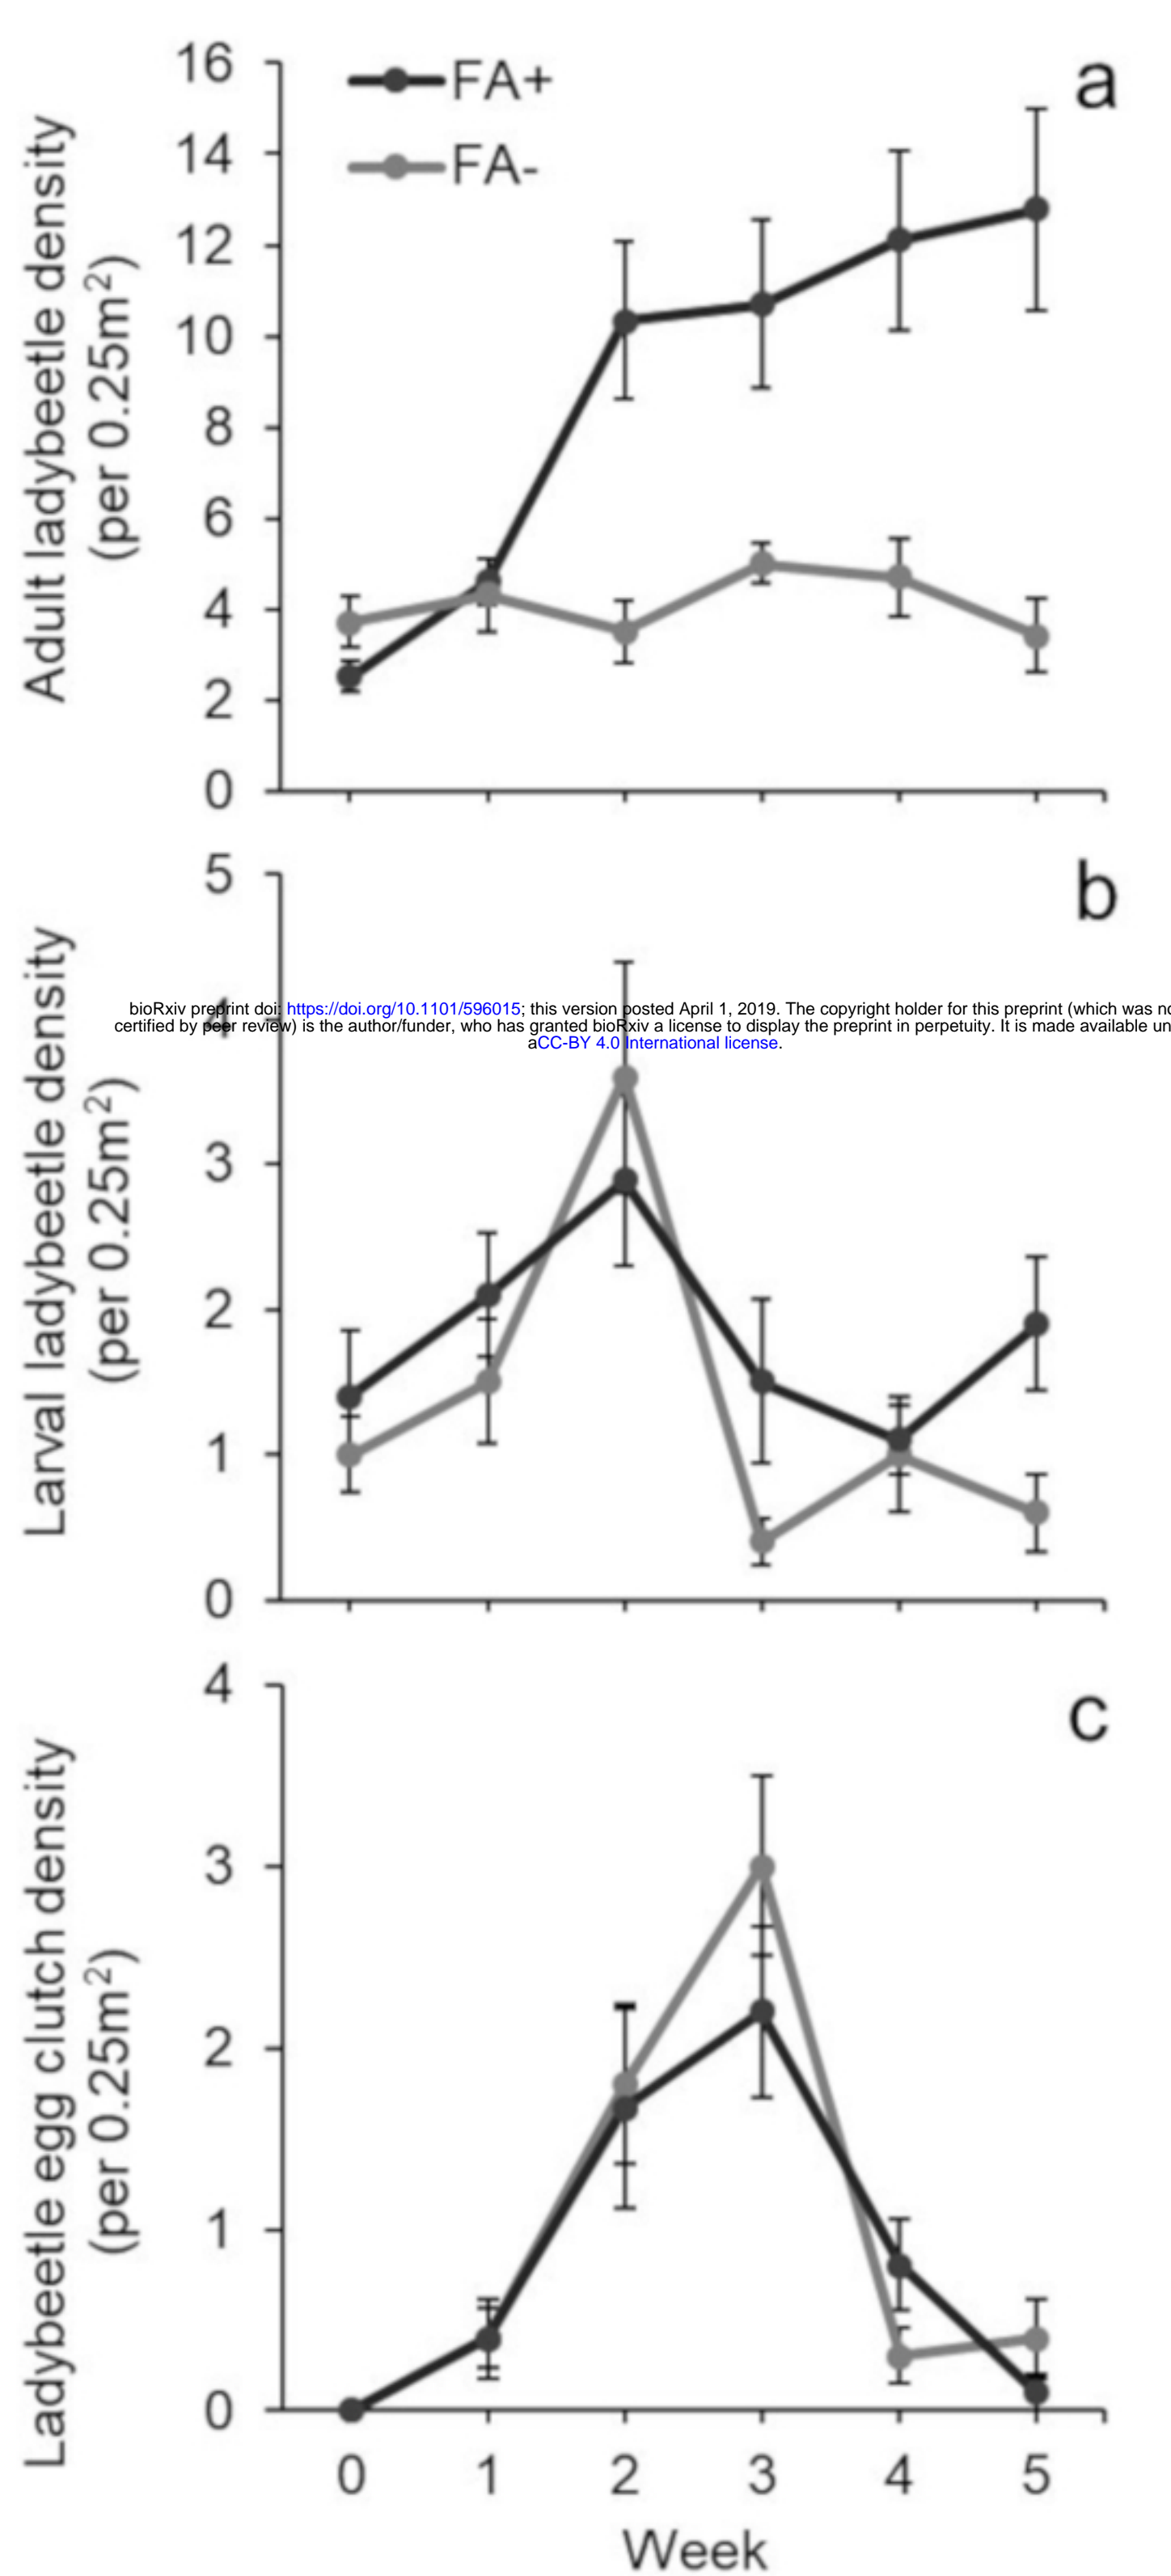

Figure 2

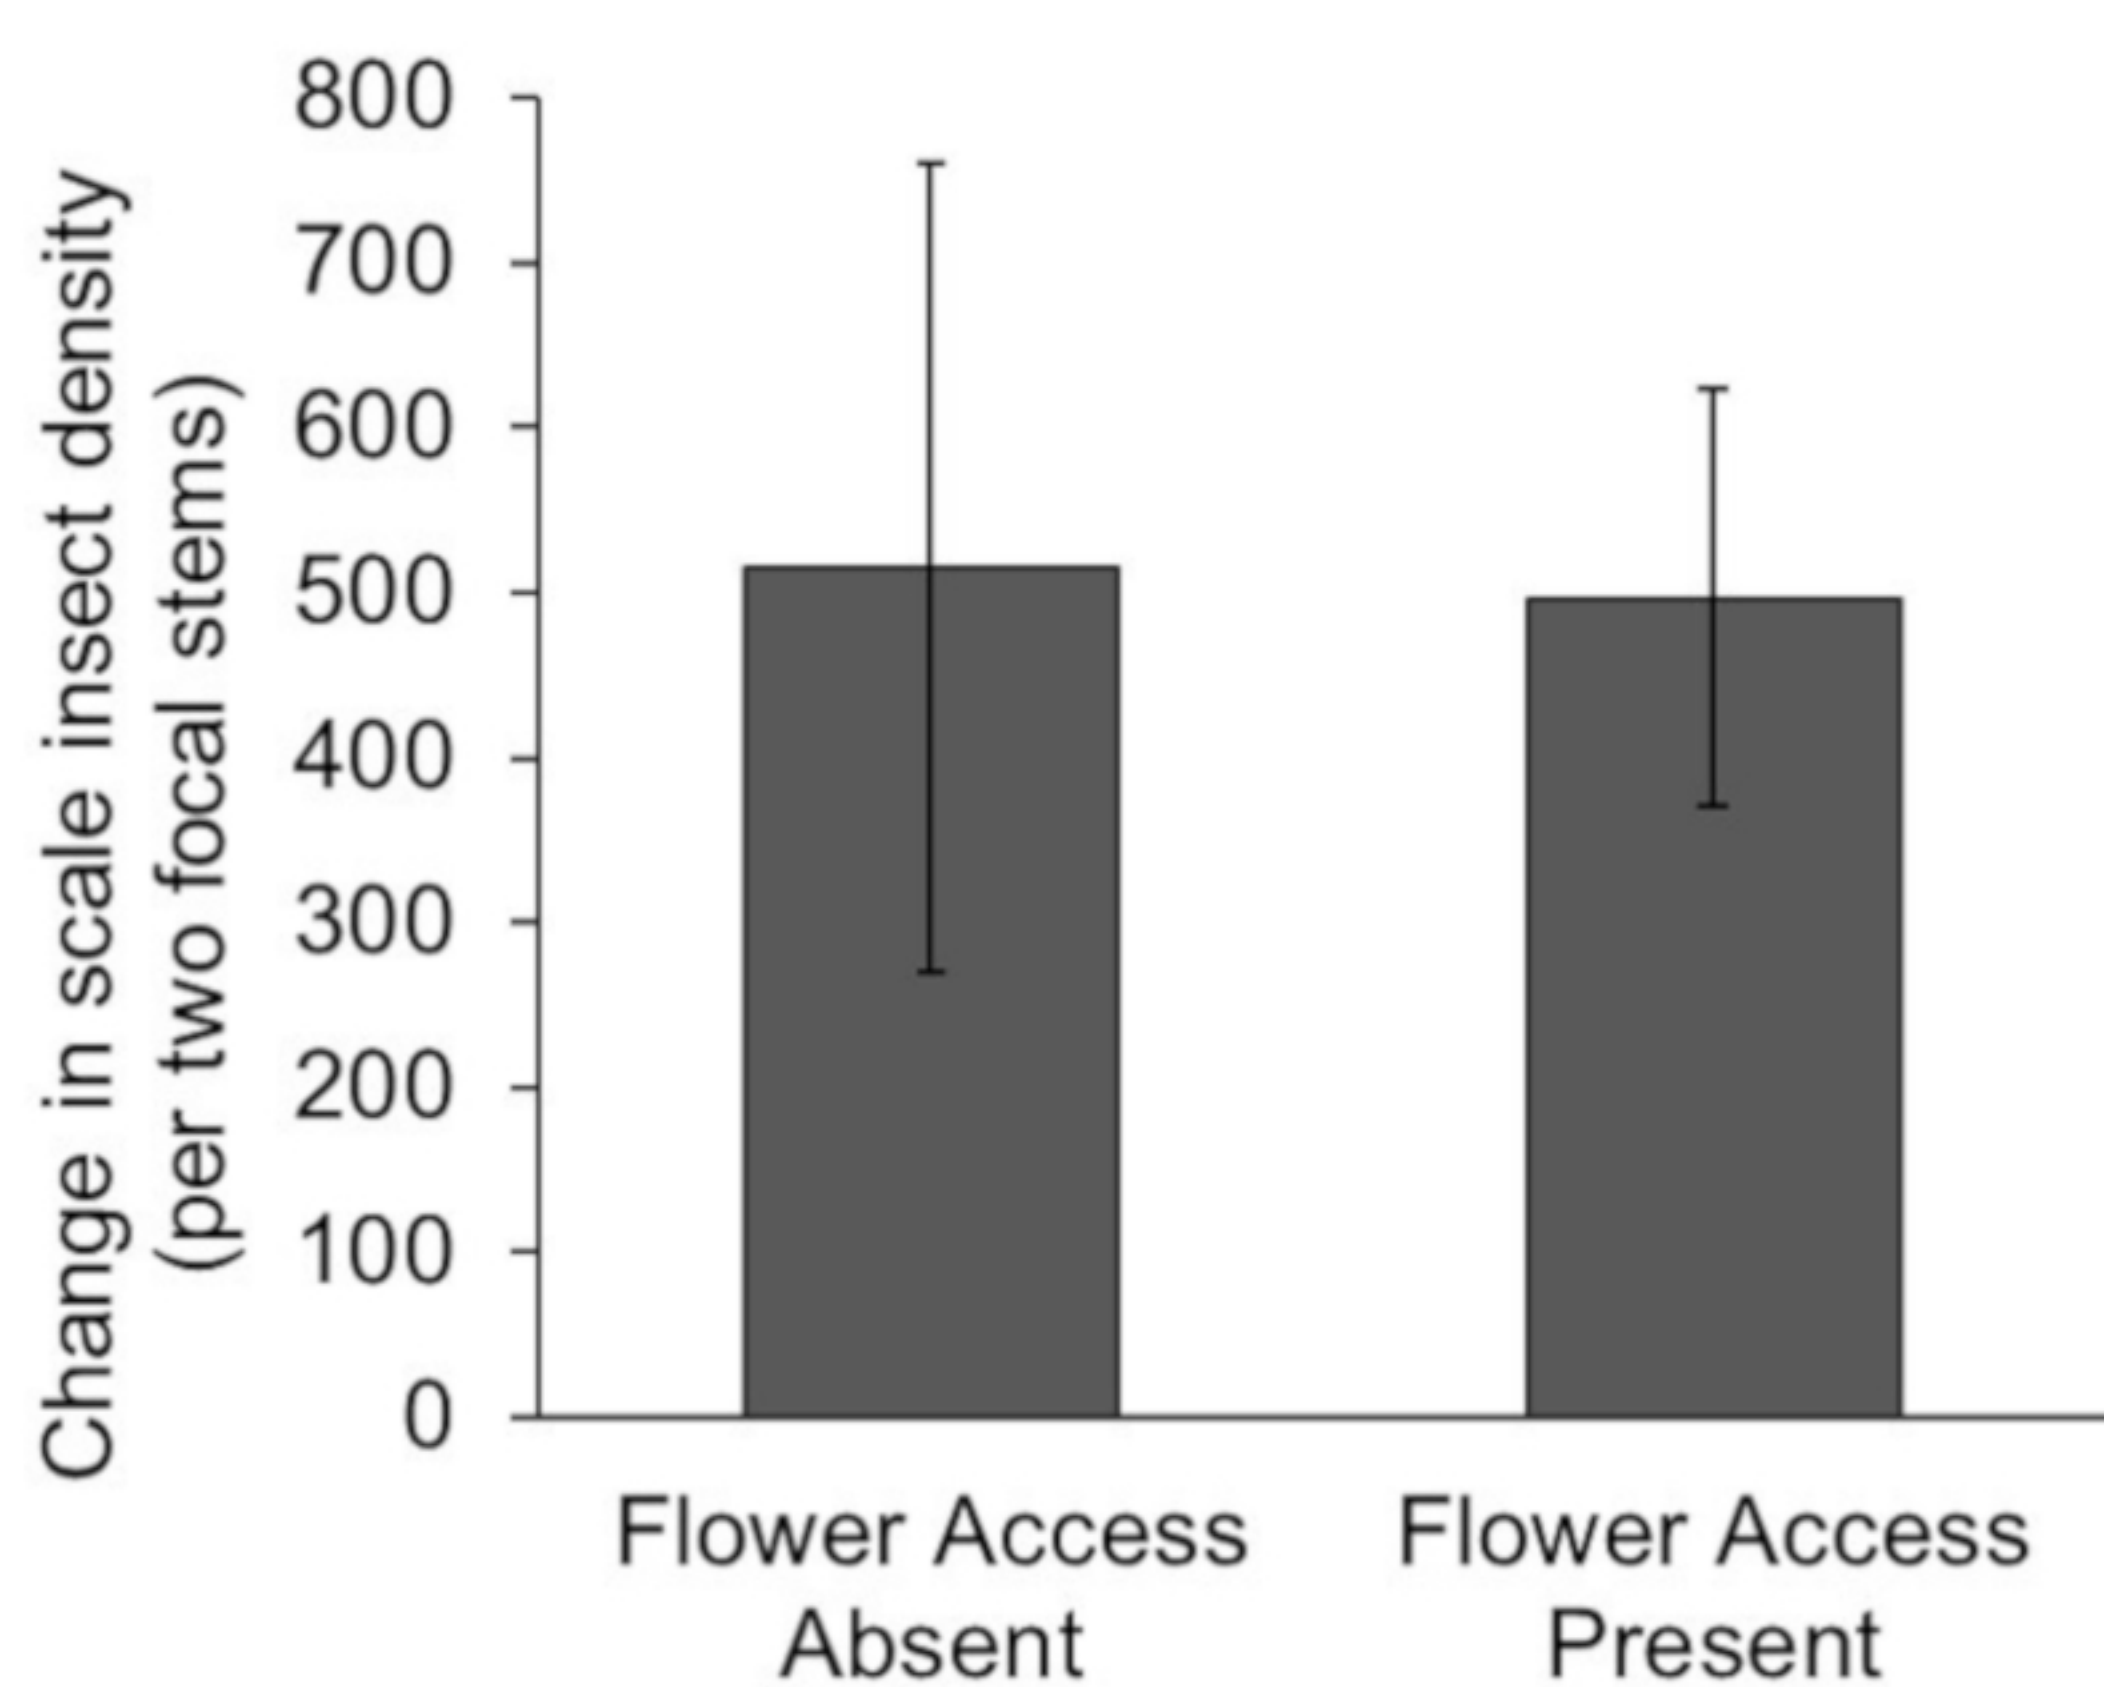

Figure 3

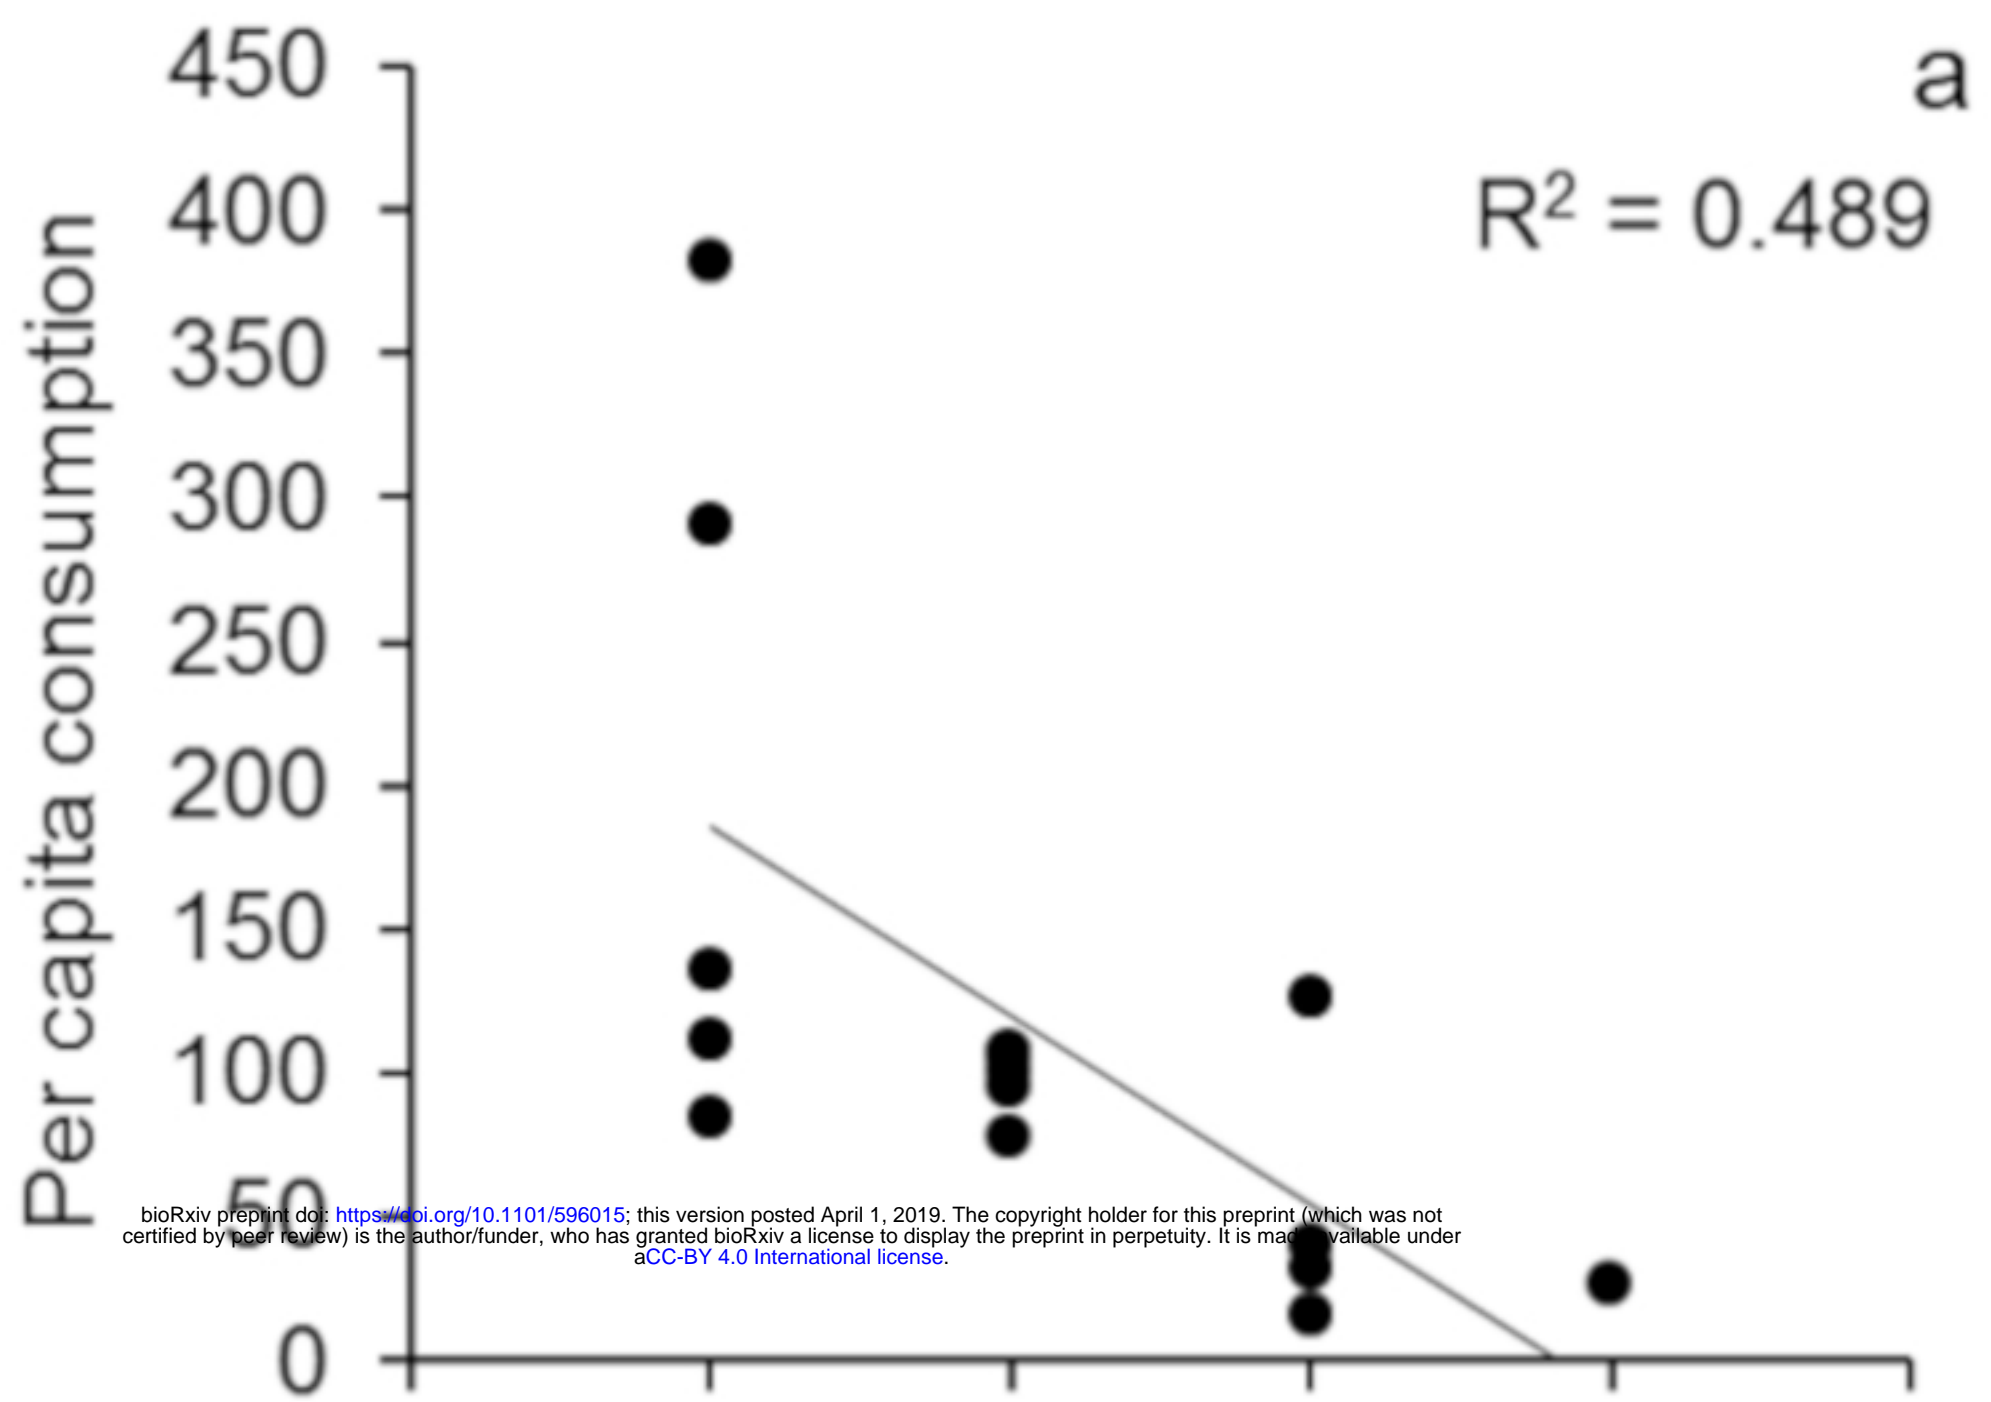

bioRxiv preprint doi: <https://doi.org/10.1101/596015>; this version posted April 1, 2019. The copyright holder for this preprint (which was not certified by peer review) is the author/funder, who has granted bioRxiv a license to display the preprint in perpetuity. It is made available under aCC-BY 4.0 International license.

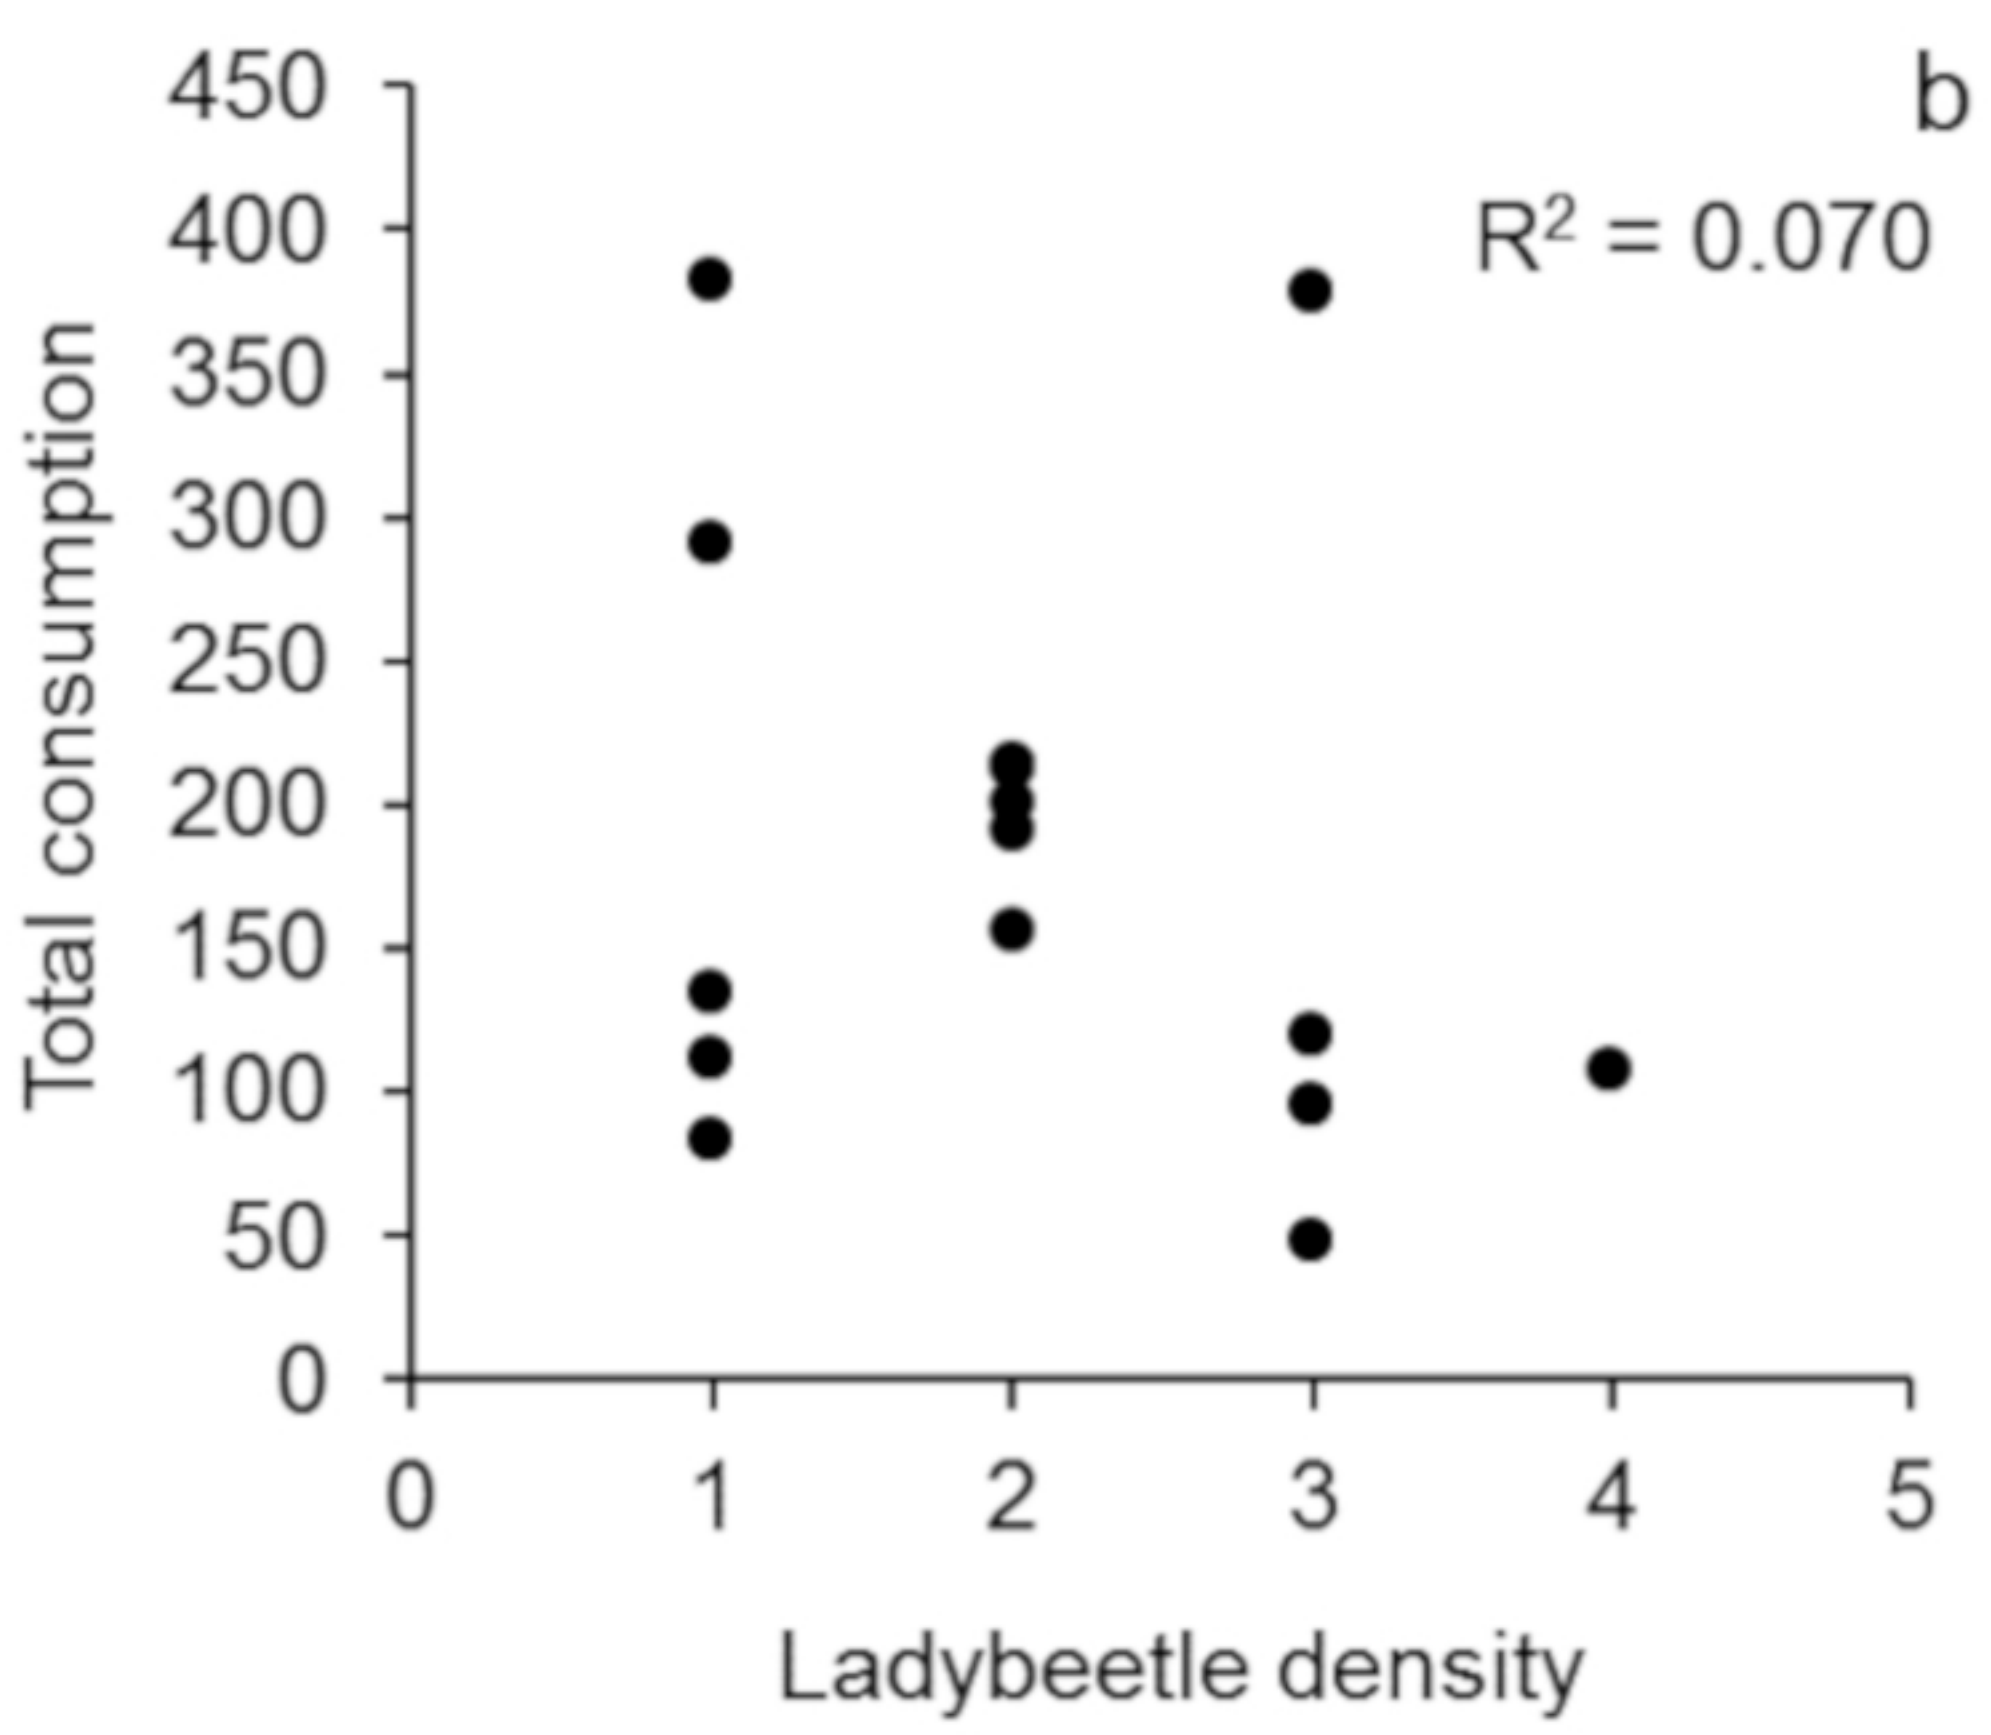

Figure 4
